# Supplementary material
Source: HighWire-hosted journal article supplement (https://erj.ersjournals.com/highwire/filestream/132614/field_highwire_adjunct_files/0/ERJ-00152-2016_Supplement.pdf)
Supplement: ERJ-00152-2016_Supplement.pdf [file ERJ-00152-2016_Supplement.pdf]

## ONLINE SUPPLEMENT

### **Association of nasopharyngeal microbiota profiles with bronchiolitis severity in infants hospitalized for bronchiolitis**

#### **Supplemental Methods**

**Figure E1.** Cluster Silhouette Plot, MARC-35 Cohort

**Figure E2.** Microbiota Association Network

**Figure E3.** Clustering and Composition in Nasopharyngeal Microbiota of 307 Infants Hospitalized for Bronchiolitis, MARC-30 Substudy

**Table E1.** Principal Investigators at the 17 Participating Sites in MARC-35

**Table E2.** Richness, Alpha-diversity, and Relative Abundance by Nasopharyngeal Microbiota Profile, MARC-35 Cohort

**Table E3.** Richness, Alpha-diversity, and Relative Abundance by Subcluster in Mixed Microbiota Profile, MARC-35 Cohort

**Table E4.** Multivariable Associations of Nasopharyngeal Microbiota Profiles with Bronchiolitis Outcomes, MARC-35 Cohort

**Table E5.** Multivariable Associations of Nasopharyngeal Microbiota Profiles with Bronchiolitis Outcomes by Viral Pathogen, MARC-35 Cohort

**Table E6.** Unadjusted and Multivariable Associations of Nasopharyngeal Microbiota Profiles with Hospital Length-of-Stay, MARC-35 Cohort

**Table E7.** Richness, Alpha-diversity, and Relative Abundance by Nasopharyngeal Microbiota Profile, MARC-30 Substudy

**Table E8.** Richness, Alpha-diversity, and Relative Abundance by Subcluster in Mixed Microbiota Profile in MARC-30 Substudy

**Table E9.** Unadjusted and Multivariable Associations of Nasopharyngeal Microbiota Profiles with Bronchiolitis Outcomes, MARC-30 Substudy

## **SUPPLEMENTAL METHODS**

### **16S rRNA Gene Sequencing and Compositional Analysis**

16S rRNA gene sequencing methods were adapted from the methods developed for the NIH-Human Microbiome Project (1, 2). As nasopharyngeal aspirate samples had a low bacterial biomass, we processed all samples with a low-biomass extraction protocol to avoid sample loss and degradation and to maximize yield. Bacterial genomic DNA was extracted using MO BIO PowerSoil DNA Isolation Kit (Mo Bio Laboratories; Carlsbad, CA) (3), with lowering the amount of buffers C1 (60 µl), C2 (50 µl), C3 (50 µl), C4 (500 µl), and C6 (50 µl). The 16S rDNA V4 region was amplified by PCR and sequenced in the MiSeq platform (Illumina; San Diego, CA) using the 2x250 bp paired-end protocol yielding pair-end reads that overlap almost completely. The primers used for amplification contain adapters for MiSeq sequencing and single-end barcodes allowing pooling and direct sequencing of PCR products (4, 5).

Sequencing read pairs were demultiplexed based on the unique molecular barcodes, and reads were merged using USEARCH v7.0.1090 (6), allowing zero mismatches and a minimum overlap of 50 bases. Merged reads were trimmed at the first base with a Q5 quality score. We calculated the expected error after taking into account all Q-scores across all the bases of a read and the probability of an error occurring (7). Additionally, a quality filter was applied to the resulting merged reads and reads containing above 0.05 expected errors were discarded. Rarefaction curves of bacterial operational taxonomic units (OTUs) were constructed using sequence data for each sample to ensure coverage of the bacterial diversity present. Samples with suboptimal amounts of sequencing reads were re-sequenced to ensure that the majority of bacterial taxa were encompassed in our analyses.

16S rRNA gene sequences were clustered into OTUs at a similarity cutoff value of 97%

using the UPARSE algorithm (8). OTUs were determined by mapping the centroids to the SILVA database (9) containing only the 16S V4 region to determine taxonomies. A custom script constructed a rarefied OTU table (rarefaction was performed at only one sequence depth) from the output files generated in the previous two steps for downstream analyses of alpha-diversity (e.g., Shannon index) and beta-diversity (e.g., weighted UniFrac) (10, 11). Shannon diversity index is a quantitative measure that takes into account not only richness but also proportion of each bacteria (evenness) within the local community. The weighted UniFrac algorithm calculates the distance between microbial communities based on the phylogenetic relatedness of lineages and relative abundance in each sample.

## **Quality Control**

The processes involving microbial DNA extraction, 16S rRNA gene amplification, and amplicon sequencing included a set of controls that enabled us to evaluate the potential introduction of contamination or off-target amplification. Non-template controls (extraction chemistries) were included in the microbial DNA extraction process and the resulting material was subsequently used for PCR amplification. Additionally, at the step of amplification, another set of non-template controls (PCR-mix) was included to evaluate the potential introduction of contamination at this step. Similarly, a positive control comprised of known and previously characterized microbial DNA was included at this step to evaluate the efficiency of the amplification process. Before samples (unknowns) were pooled together, sequencing controls were evaluated and the rejection criteria were the presence of amplicons in any of the non-template controls or the absence of amplicons in the positive control. In the present study, no

amplicons were observed in the non-template controls and a negligible amount of raw reads were recovered after sequencing.

### **Microbiota Association Network Analysis**

As the presence and/or abundance of an individual genus likely interacts and influences other genera in the microbial community, we displayed the microbiota association network on the basis of the approach of Faust *et al.* (12) using the CoNet software (13). To obtain this network, we first filtered out genera which do not appear in at least 10% of the samples. We then selected the top 50 and bottom 50 relationships for each of four methods: Spearman correlation, Pearson correlation, Bray-Curtis dissimilarity, and Kullback-Leibler dissimilarity. The final network included the edges that were significant ( $P < 0.05$ ) in any of the four methods used.

### **REFERENCES**

1. Human Microbiome Project C. A framework for human microbiome research. *Nature* 2012;486:215-221.
2. Human Microbiome Project C. Structure, function and diversity of the healthy human microbiome. *Nature* 2012;486:207-214.
3. Powersoil® DNA isolation kit. [cited May 13, 2016]. Available from: <https://mobio.com/media/wysiwyg/pdfs/protocols/12888.pdf>.
4. Caporaso JG, Kuczynski J, Stombaugh J, Bittinger K, Bushman FD, Costello EK, Fierer N, Pena AG, Goodrich JK, Gordon JI, Huttley GA, Kelley ST, Knights D, Koenig JE, Ley RE, Lozupone CA, McDonald D, Muegge BD, Pirrung M, Reeder J, Sevinsky JR, Turnbaugh PJ,

- Walters WA, Widmann J, Yatsunenko T, Zaneveld J, Knight R. Qiime allows analysis of high-throughput community sequencing data. *Nature Methods* 2010;7:335-336.
5. Caporaso JG, Lauber CL, Walters WA, Berg-Lyons D, Huntley J, Fierer N, Owens SM, Betley J, Fraser L, Bauer M, Gormley N, Gilbert JA, Smith G, Knight R. Ultra-high-throughput microbial community analysis on the illumina hiseq and miseq platforms. *ISME J* 2012;6:1621-1624.
  6. Edgar RC. Search and clustering orders of magnitude faster than blast. *Bioinformatics* 2010;26:2460-2461.
  7. Edgar RC, Flyvbjerg H. Error filtering, pair assembly and error correction for next-generation sequencing reads. *Bioinformatics* 2015;31:3476-3482.
  8. Edgar RC. Uparse: Highly accurate otu sequences from microbial amplicon reads. *Nature Methods* 2013;10:996-998.
  9. Quast C, Pruesse E, Yilmaz P, Gerken J, Schweer T, Yarza P, Peplies J, Glockner FO. The silva ribosomal rna gene database project: Improved data processing and web-based tools. *Nucleic Acids Res* 2013;41:D590-596.
  10. Lozupone C, Lladser ME, Knights D, Stombaugh J, Knight R. Unifrac: An effective distance metric for microbial community comparison. *ISME J* 2011;5:169-172.
  11. Lozupone C, Knight R. Unifrac: A new phylogenetic method for comparing microbial communities. *Appl Environ Microbiol* 2005;71:8228-8235.
  12. Faust K, Sathirapongsasuti JF, Izard J, Segata N, Gevers D, Raes J, Huttenhower C. Microbial co-occurrence relationships in the human microbiome. *PLoS Computational Biol* 2012;8:e1002606.

13. Conet: co-occurrence network inference. [cited May 13, 2016]. Available from:  
<http://systemsbiology.vub.ac.be/conet>.

### Figure E1. Cluster Silhouette Plot, MARC-35 Cohort

We evaluated the number of clusters using the cluster silhouette plot method as implemented in the R package *cluster*. The silhouette plot presents the silhouette width for each observation in each cluster group. The silhouette width measures the within cluster to between cluster dissimilarity properties of each observation and higher values are indicative of strong within cluster similarity. Silhouette analysis also provides an average silhouette width as a property of each cluster within the overall clustering outcome. We evaluated clustering with  $k=3, 4$ , and 5 groups. The  $k=4$  was chosen because it obtained the highest within cluster mean silhouette widths.

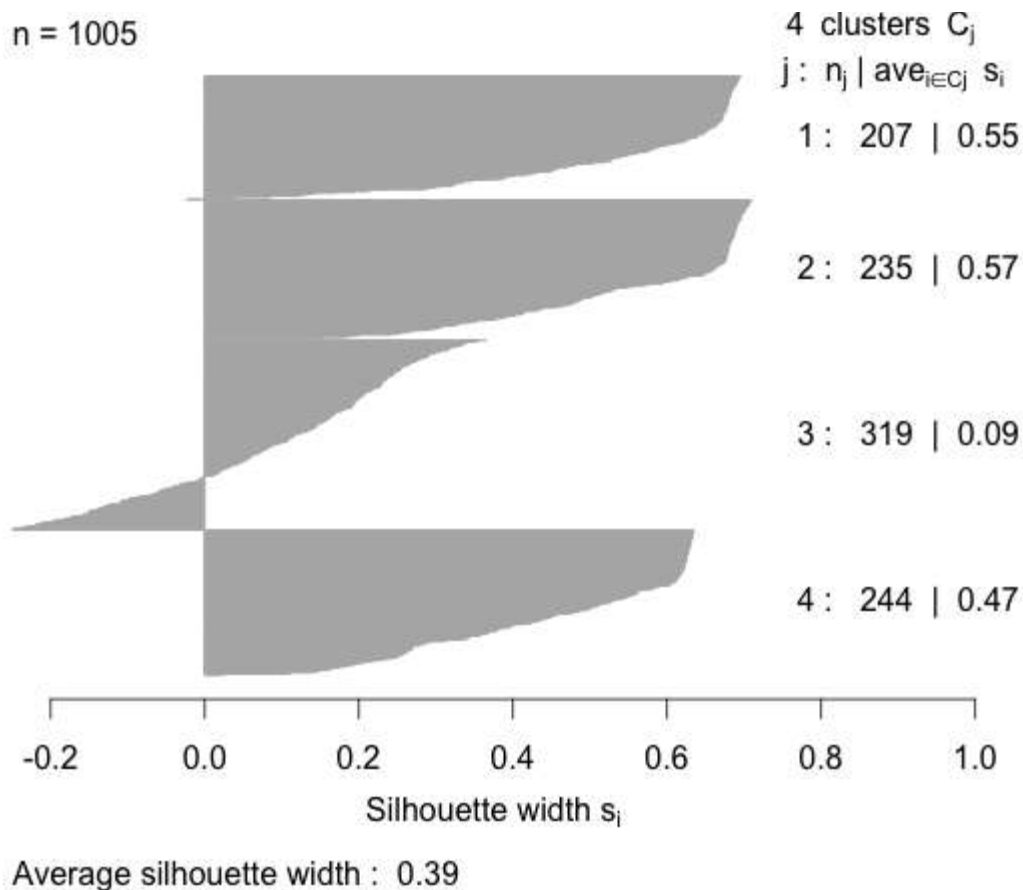

## Figure E2. Microbiota Association Network

Nasopharyngeal microbiota network is shown. Green edges indicate co-occurrence, while red edges indicate mutual exclusion. Also note that the graphical distance between nodes is not an actual reflection of the mathematical distance. *Haemophilus*, *Moraxella*, and *Streptococcus* genera were negatively associated with each other, which is consistent with the observed *Haemophilus*-, *Moraxella*-, and *Streptococcus*-dominant profiles. *Streptococcus* genus was positively associated with *Veillonella*, which was also positively associated with *Prevotella* and *Alloprevotella*. This community structure was consistent with the mixed microbiota profile.

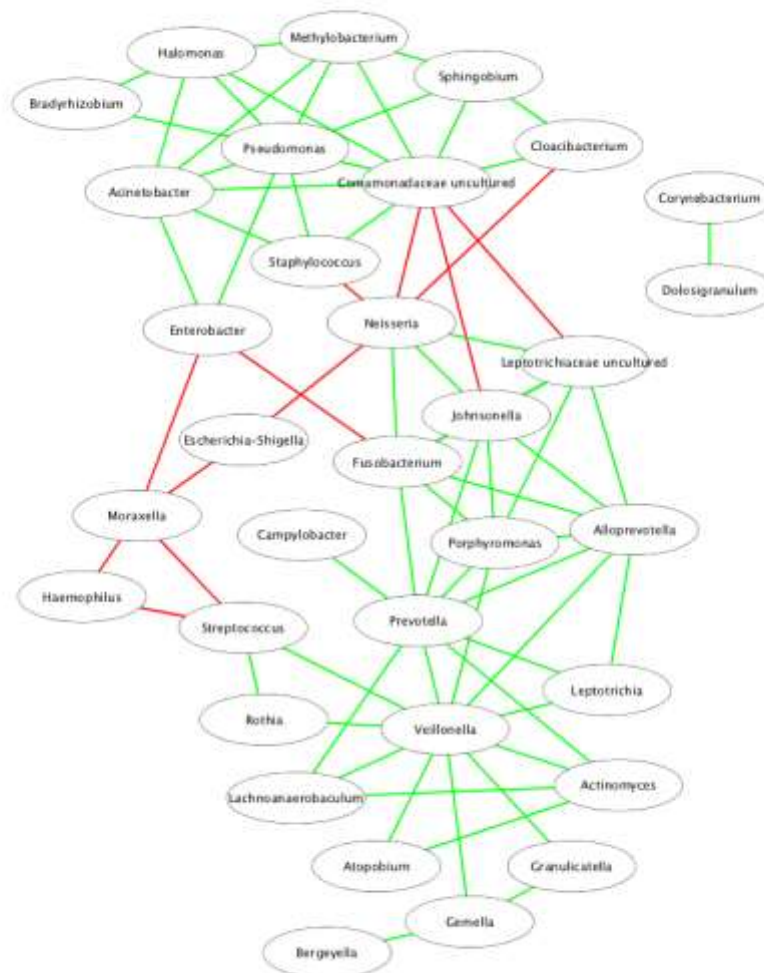



# **Figure E3. Clustering and Composition in Nasopharyngeal Microbiota of 307 Infants Hospitalized for Bronchiolitis, MARC-30 Substudy**

All microbiota profiles of infants were clustered using partitioning around medoids clustering method with weighted UniFrac distance. Colored bars indicate 4 microbiota profiles:

*Haemophilus*-dominant profile (green), *Moraxella*-dominant profile (red), *Streptococcus*-dominant profile (yellow), and mixed profile (blue). To obtain further information about the bacterial composition of samples within microbiota profiles, we displayed the 10 most abundant genera present in an adjacent heatmap. HDP = *Haemophilus*-dominant profile; MDP = *Moraxella*-dominant profile; SDP = *Streptococcus*-dominant profile; MP = mixed profile.

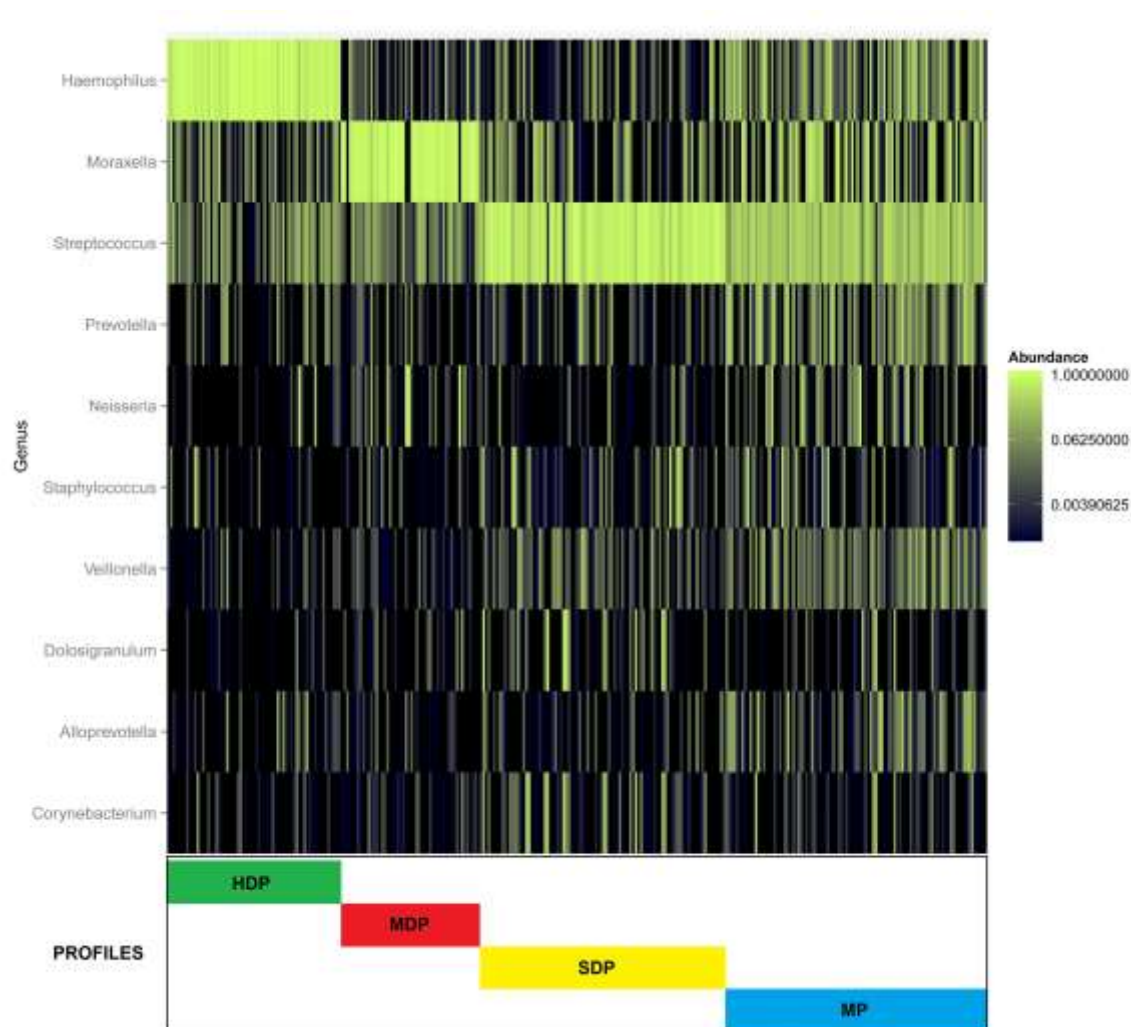

**Table E1. Principal Investigators at the 17 Participating Sites in MARC-35**

|                                                   |                                                                   |
|---------------------------------------------------|-------------------------------------------------------------------|
| Amy D. Thompson, MD                               | Alfred I. duPont Hospital for Children, Wilmington, DE            |
| Federico R. Laham, MD, MS                         | Arnold Palmer Hospital for Children, Orlando, FL                  |
| Jonathan M. Mansbach, MD, MPH                     | Boston Children's Hospital, Boston, MA                            |
| Vincent J. Wang, MD, MHA                          | Children's Hospital of Los Angeles, Los Angeles, CA               |
| Michelle B. Dunn, MD                              | Children's Hospital of Philadelphia, Philadelphia, PA             |
| Juan C. Celedon, MD, DrPH                         | Children's Hospital of Pittsburgh, Pittsburgh, PA                 |
| Michael Gomez, MD, MS-HCA and Nancy Inhofe, MD    | The Children's Hospital at St. Francis, Tulsa, OK                 |
| Brian M. Pate, MD and Henry T. Puls, MD           | The Children's Mercy Hospital & Clinics, Kansas City, MO          |
| Stephen J. Teach, MD, MPH                         | Children's National Medical Center, Washington, D.C.              |
| Richard T. Strait, MD                             | Cincinnati Children's Hospital and Medical Center, Cincinnati, OH |
| Ilana Waynik, MD                                  | Connecticut Children's Medical Center, Hartford, CT               |
| Sujit Iyer, MD                                    | Dell Children's Medical Center of Central Texas, Austin, TX       |
| Michelle D. Stevenson, MD, MS                     | Kosair Children's Hospital, Louisville, KY                        |
| Wayne G. Schreffler, MD, PhD and Ari R. Cohen, MD | Massachusetts General Hospital, Boston, MA                        |
| Anne K. Beasley, MD                               | Phoenix Children's Hospital, Phoenix, AZ                          |
| Thida Ong, MD                                     | Seattle Children's Hospital, Seattle, WA                          |
| Charles G. Macias, MD, MPH                        | Texas Children's Hospital, Houston, TX                            |

**Table E2. Richness, Alpha-diversity, and Relative Abundance by Nasopharyngeal Microbiota Profile in MARC-35 Cohort**

| Indices                                                         | <i>Haemophilus</i> -<br>dominant<br>profile<br>n=193 (19.2%) | <i>Moraxella</i> -<br>dominant<br>profile<br>n=220 (21.9%) | <i>Streptococcus</i> -<br>dominant<br>profile<br>n=283 (28.2%) | Mixed<br>profile<br>n=309 (30.7%) | P-value |
|-----------------------------------------------------------------|--------------------------------------------------------------|------------------------------------------------------------|----------------------------------------------------------------|-----------------------------------|---------|
| <b>Richness</b>                                                 |                                                              |                                                            |                                                                |                                   |         |
| Number of genera,<br>median (IQR)                               | 14 (7-21)                                                    | 13 (7-20)                                                  | 17 (10-26)                                                     | 20 (12-27)                        | <0.001  |
| <b>Alpha-diversity, median (IQR)</b>                            |                                                              |                                                            |                                                                |                                   |         |
| Shannon index                                                   | 0.68 (0.38-1.06)                                             | 0.56 (0.25-0.98)                                           | 0.88 (0.53-1.39)                                               | 1.35 (0.97-1.80)                  | <0.001  |
| <b>Relative abundance of 10 most abundant genera, mean (SD)</b> |                                                              |                                                            |                                                                |                                   |         |
| <i>Streptococcus</i>                                            | 0.06 (0.07)                                                  | 0.06 (0.06)                                                | 0.67 (0.24)                                                    | 0.32 (0.14)                       | 0.003*  |
| <i>Moraxella</i>                                                | 0.09 (0.13)                                                  | 0.82 (0.16)                                                | 0.06 (0.10)                                                    | 0.27 (0.25)                       | 0.003*  |
| <i>Haemophilus</i>                                              | 0.76 (0.19)                                                  | 0.03 (0.08)                                                | 0.03 (0.06)                                                    | 0.13 (0.17)                       | 0.003*  |
| <i>Prevotella</i>                                               | 0.01 (0.03)                                                  | 0.01 (0.02)                                                | 0.02 (0.05)                                                    | 0.04 (0.10)                       | 0.003*  |
| <i>Staphylococcus</i>                                           | 0.01 (0.02)                                                  | 0.00 (0.02)                                                | 0.05 (0.16)                                                    | 0.01 (0.04)                       | 0.003*  |
| <i>Neisseria</i>                                                | 0.01 (0.06)                                                  | 0.02 (0.05)                                                | 0.01 (0.03)                                                    | 0.04 (0.10)                       | 0.003*  |
| <i>Corynebacterium</i>                                          | 0.00 (0.02)                                                  | 0.01 (0.02)                                                | 0.03 (0.10)                                                    | 0.02 (0.06)                       | 0.009*  |
| <i>Alloprevotella</i>                                           | 0.01 (0.02)                                                  | 0.01 (0.02)                                                | 0.01 (0.04)                                                    | 0.03 (0.07)                       | 0.003*  |
| <i>Veillonella</i>                                              | 0.00 (0.01)                                                  | 0.00 (0.01)                                                | 0.02 (0.05)                                                    | 0.02 (0.03)                       | 0.003*  |
| <i>Gemella</i>                                                  | 0.00 (0.01)                                                  | 0.00 (0.01)                                                | 0.01 (0.03)                                                    | 0.01 (0.05)                       | 0.003*  |

Abbreviations: IQR, interquartile range; SD, standard deviation

\* Benjamini-Hochberg adjusted P-value accounting for multiple comparisons

**Table E3. Richness, Alpha-diversity, and Relative Abundance by Subcluster in Mixed Microbiota Profile, MARC-35 Cohort**

| Indices                                                       | Subcluster 1<br>n=158 | Subcluster 2<br>n=77 | Subcluster 3<br>n=74 | P-value |
|---------------------------------------------------------------|-----------------------|----------------------|----------------------|---------|
| <b>Richness</b>                                               |                       |                      |                      |         |
| Number of genera,<br>median (IQR)                             | 14 (8-22)             | 21 (16-27)           | 28 (22-36)           | <0.001  |
| <b>Alpha-diversity, median (IQR)</b>                          |                       |                      |                      |         |
| Shannon index                                                 | 1.10 (0.83-1.40)      | 1.37 (1.08-1.69)     | 2.02 (1.70-2.19)     | <0.001  |
| <b>Relative abundance of 10 most common genera, mean (SD)</b> |                       |                      |                      |         |
| <i>Streptococcus</i>                                          | 0.36 (0.13)           | 0.33 (0.13)          | 0.22 (0.11)          | 0.002*  |
| <i>Moraxella</i>                                              | 0.48 (0.15)           | 0.07 (0.10)          | 0.03 (0.05)          | 0.002*  |
| <i>Haemophilus</i>                                            | 0.03 (0.05)           | 0.38 (0.15)          | 0.08 (0.08)          | 0.002*  |
| <i>Prevotella</i>                                             | 0.02 (0.05)           | 0.03 (0.06)          | 0.12 (0.15)          | 0.002*  |
| <i>Staphylococcus</i>                                         | 0.01 (0.02)           | 0.02 (0.05)          | 0.03 (0.05)          | 0.02*   |
| <i>Neisseria</i>                                              | 0.02 (0.06)           | 0.02 (0.05)          | 0.11 (0.16)          | 0.002*  |
| <i>Corynebacterium</i>                                        | 0.01 (0.06)           | 0.01 (0.07)          | 0.02 (0.07)          | 0.99*   |
| <i>Alloprevotella</i>                                         | 0.01 (0.02)           | 0.01 (0.02)          | 0.08 (0.12)          | 0.002*  |
| <i>Veillonella</i>                                            | 0.01 (0.02)           | 0.02 (0.04)          | 0.03 (0.04)          | 0.002*  |
| <i>Gemella</i>                                                | 0.00 (0.01)           | 0.01 (0.06)          | 0.03 (0.06)          | 0.01*   |

Abbreviations: IQR, interquartile range; SD, standard deviation

The number of subclusters for the data was determined using the average silhouette score.

\* Benjamini-Hochberg adjusted P-value accounting for multiple comparisons

**Table E4. Multivariable Associations of Nasopharyngeal Microbiota Profiles with Bronchiolitis Outcomes, MARC-35 Cohort**

|                                                              | Intensive care use*     |                  | Hospital length-of-stay<br>≥3 days |                  |
|--------------------------------------------------------------|-------------------------|------------------|------------------------------------|------------------|
|                                                              | OR (95% CI)             | P-value          | OR (95% CI)                        | P-value          |
| <b>Primary Exposure (Microbiota Profile)</b>                 |                         |                  |                                    |                  |
| <i>Haemophilus</i> -dominant profile                         | <b>1.98 (1.08-3.62)</b> | <b>0.03</b>      | <b>2.47 (1.60-3.83)</b>            | <b>&lt;0.001</b> |
| <i>Moraxella</i> -dominant profile                           | Reference               |                  | Reference                          |                  |
| <i>Streptococcus</i> -dominant profile                       | 1.32 (0.74-2.34)        | 0.34             | 1.06 (0.71-1.57)                   | 0.78             |
| Mixed profile                                                | 1.19 (0.68-2.09)        | 0.54             | 1.01 (0.68-1.48)                   | 0.97             |
| <b>Covariate</b>                                             |                         |                  |                                    |                  |
| Age (mo)                                                     |                         |                  |                                    |                  |
| <2                                                           | Reference               |                  | Reference                          |                  |
| 2-5.9                                                        | <b>0.33 (0.21-0.51)</b> | <b>&lt;0.001</b> | 0.79 (0.57-1.09)                   | 0.15             |
| 6-12                                                         | <b>0.29 (0.16-0.52)</b> | <b>&lt;0.001</b> | <b>0.44 (0.29-0.68)</b>            | <b>&lt;0.001</b> |
| Male (vs. female) sex                                        | 0.95 (0.65-1.38)        | 0.77             | 0.98 (0.74-1.29)                   | 0.87             |
| Race/ethnicity                                               |                         |                  |                                    |                  |
| Non-Hispanic white                                           | Reference               |                  | Reference                          |                  |
| Non-Hispanic black                                           | 0.81 (0.48-1.38)        | 0.34             | 0.71 (0.50-1.02)                   | 0.06             |
| Hispanic                                                     | 1.05 (0.63-1.74)        | 0.85             | 0.96 (0.68-1.35)                   | 0.82             |
| Other                                                        | 1.60 (0.59-4.36)        | 0.35             | 0.97 (0.47-2.03)                   | 0.95             |
| Prematurity (32-37 weeks)                                    | 1.33 (0.84-2.10)        | 0.22             | 1.16 (0.82-1.64)                   | 0.39             |
| Previous breathing problems before the index hospitalization | 1.37 (0.81-2.32)        | 0.23             | 1.38 (0.96-2.00)                   | 0.09             |
| Ever attended daycare                                        | 0.71 (0.40-1.27)        | 0.25             | 0.91 (0.64-1.30)                   | 0.61             |
| Sibling at home                                              | 1.18 (0.72-1.95)        | 0.51             | 1.39 (0.98-1.96)                   | 0.07             |
| Antibiotic use before index hospitalization                  | 0.66 (0.42-1.05)        | 0.08             | 0.91 (0.66-1.26)                   | 0.58             |
| Corticosteroid use before index hospitalization              | 1.91 (1.09-3.33)        | 0.02             | 1.31 (0.87-1.97)                   | 0.20             |
| Received antibiotics during prehospitalization visit         | <b>2.32 (1.47-3.66)</b> | <b>&lt;0.001</b> | 1.39 (0.96-1.99)                   | 0.08             |
| Virology                                                     |                         |                  |                                    |                  |
| Sole RSV infection                                           | Reference               |                  | Reference                          |                  |
| Sole rhinovirus infection                                    | 0.80 (0.35-1.81)        | 0.58             | <b>0.35 (0.18-0.68)</b>            | <b>0.002</b>     |
| RSV + rhinovirus coinfection                                 | 1.51 (0.86-2.66)        | 0.15             | 1.03 (0.68-1.59)                   | 0.85             |
| RSV + non-rhinovirus pathogens                               | 1.04 (0.56-1.95)        | 0.90             | 0.83 (0.53-1.31)                   | 0.43             |
| Rhinovirus + non-RSV pathogens                               | 0.17 (0.02-1.37)        | 0.10             | <b>0.24 (0.09-0.67)</b>            | <b>0.007</b>     |
| Neither RSV nor rhinovirus                                   | 1.16 (0.61-2.18)        | 0.65             | 0.83 (0.52-1.33)                   | 0.45             |

Abbreviations: CI, confidence interval; OR, odds ratio

Bold results are statistically significant

\* Defined as admission to intensive care unit and/or use of mechanical ventilation (continuous positive airway pressure and/or intubation during inpatient stay, regardless of location) at any time during the index hospitalization

**Table E5. Multivariable Associations of Nasopharyngeal Microbiota Profiles with Bronchiolitis Outcomes by Viral Pathogen, MARC-35 Cohort\***

| Outcome by microbiota profile          | <u>RSV infection</u><br>(n=693) <sup>†</sup> |         | <u>RSV + rhinovirus coinfection</u><br>(n=120) |         | <u>Rhinovirus infection</u><br>(n=91) <sup>‡</sup> |         | <u>Neither RSV nor rhinovirus</u><br>(n=101) |         |
|----------------------------------------|----------------------------------------------|---------|------------------------------------------------|---------|----------------------------------------------------|---------|----------------------------------------------|---------|
|                                        | OR<br>(95% CI)                               | P-value | OR<br>(95% CI)                                 | P-value | OR<br>(95% CI)                                     | P-value | OR<br>(95% CI)                               | P-value |
| <b>Intensive care use</b>              |                                              |         |                                                |         |                                                    |         |                                              |         |
| <i>Haemophilus</i> -dominant profile   | 2.60<br>(1.15-5.86)                          | 0.02    | 3.50<br>(0.45-27.4)                            | 0.23    | 3.99<br>(0.36-44.6)                                | 0.26    | 4.71<br>(0.56-39.3)                          | 0.15    |
| <i>Moraxella</i> -dominant profile     | Reference                                    |         | Reference                                      |         | Reference                                          |         | Reference                                    |         |
| <i>Streptococcus</i> -dominant profile | 1.60<br>(0.78-3.29)                          | 0.20    | 1.67<br>(0.27-10.3)                            | 0.58    | 0.57<br>(0.02-17.8)                                | 0.75    | 1.84<br>(0.17-19.5)                          | 0.61    |
| Mixed profile                          | 1.81<br>(0.87-3.75)                          | 0.11    | 0.74<br>(0.15-3.67)                            | 0.71    | 0.29<br>(0.01-6.4)                                 | 0.43    | 0.85<br>(0.09-7.90)                          | 0.88    |
| <b>Hospital length-of-stay ≥3 days</b> |                                              |         |                                                |         |                                                    |         |                                              |         |
| <i>Haemophilus</i> -dominant profile   | 3.56<br>(2.02-6.29)                          | <0.001  | 1.67<br>(0.41-6.93)                            | 0.48    | 1.37<br>(0.26-7.18)                                | 0.71    | 2.93<br>(0.73-11.7)                          | 0.13    |
| <i>Moraxella</i> -dominant profile     | Reference                                    |         | Reference                                      |         | Reference                                          |         | Reference                                    |         |
| <i>Streptococcus</i> -dominant profile | 1.30<br>(0.82-2.01)                          | 0.27    | 0.33<br>(0.09-1.23)                            | 0.10    | 0.53<br>(0.03-8.56)                                | 0.65    | 1.72<br>(0.38-7.88)                          | 0.48    |
| Mixed profile                          | 1.14<br>(0.71-1.83)                          | 0.60    | 0.45<br>(0.15-1.40)                            | 0.17    | 0.69<br>(0.09-5.02)                                | 0.71    | 4.55<br>(1.11-18.6)                          | 0.04    |

Abbreviations: CI, confidence interval; OR, odds ratio; RSV, respiratory syncytial virus

\* Mixed-effects logistic regression model adjusting for 10 patient-level variables (age, sex, race/ethnicity, gestational age, history of breathing problems, daycare attendance, siblings at home, lifetime history of antibiotic use, history of corticosteroid use, and use of antibiotics during the pre-hospitalization visit) and sites as random effect

<sup>†</sup> RSV with or without non-rhinovirus pathogens

<sup>‡</sup> Rhinovirus with or without non-RSV pathogens

**Table E6. Unadjusted and Multivariable Associations of Nasopharyngeal Microbiota Profiles with Hospital Length-of-Stay, MARC-35 Cohort**

| Outcome by microbiota profile            | <u>Unadjusted model</u> |         | <u>Adjusted model*</u> |         |
|------------------------------------------|-------------------------|---------|------------------------|---------|
|                                          | RR (95% CI)             | P-value | RR (95% CI)            | P-value |
| Hospital length-of-stay (count variable) |                         |         |                        |         |
| <i>Haemophilus</i> -dominant profile     | 1.22 (1.10-1.36)        | <0.001  | 1.23 (1.10-1.38)       | <0.001  |
| <i>Moraxella</i> -dominant profile       | Reference               |         | Reference              |         |
| <i>Streptococcus</i> -dominant profile   | 1.05 (0.94-1.16)        | 0.39    | 0.89 (0.80-0.99)       | 0.03    |
| Mixed profile                            | 0.92 (0.83-1.02)        | 0.11    | 0.86 (0.77-0.96)       | 0.007   |

Abbreviations: CI, confidence interval; RR, rate ratio

\* Mixed-effects Poisson regression model adjusting for 11 patient-level variables (age, sex, race/ethnicity, gestational age, history of breathing problems, daycare attendance, siblings at home, lifetime history of antibiotic use, history of corticosteroid use, use of antibiotics during the pre-hospitalization visit, and respiratory viruses detected by PCR) and sites as random effect

**Table E7. Richness, Alpha-diversity, and Relative Abundance by Nasopharyngeal Microbiota Profile in MARC-30 Substudy**

| Indices                                                       | <i>Haemophilus</i> -<br>dominant<br>profile<br>n=65 (21.2%) | <i>Moraxella</i> -<br>dominant<br>profile<br>n=52 (16.9%) | <i>Streptococcus</i> -<br>dominant<br>profile<br>n=92 (30.0%) | Mixed<br>Profile*<br>n=98 (31.9%) | P-value |
|---------------------------------------------------------------|-------------------------------------------------------------|-----------------------------------------------------------|---------------------------------------------------------------|-----------------------------------|---------|
| <b>Richness</b>                                               |                                                             |                                                           |                                                               |                                   |         |
| Number of genera,<br>median (IQR)                             | 9 (4-14)                                                    | 11 (6-17)                                                 | 14 (9-19)                                                     | 21 (15-28)                        | <0.001  |
| <b>Alpha-diversity, median (IQR)</b>                          |                                                             |                                                           |                                                               |                                   |         |
| Shannon index                                                 | 0.56 (0.19-0.99)                                            | 0.56 (0.27-0.94)                                          | 1.03 (0.72-1.32)                                              | 1.71 (1.37-2.06)                  | <0.001  |
| <b>Relative abundance of 10 most common genera, mean (SD)</b> |                                                             |                                                           |                                                               |                                   |         |
| <i>Streptococcus</i>                                          | 0.06 (0.07)                                                 | 0.06 (0.07)                                               | 0.66 (0.23)                                                   | 0.28 (0.13)                       | 0.003†  |
| <i>Haemophilus</i>                                            | 0.81 (0.16)                                                 | 0.03 (0.08)                                               | 0.04 (0.08)                                                   | 0.11 (0.14)                       | 0.003†  |
| <i>Moraxella</i>                                              | 0.05 (0.09)                                                 | 0.75 (0.27)                                               | 0.06 (0.10)                                                   | 0.18 (0.23)                       | 0.003†  |
| <i>Prevotella</i>                                             | 0.02 (0.04)                                                 | 0.01 (0.03)                                               | 0.02 (0.05)                                                   | 0.09 (0.13)                       | 0.003†  |
| <i>Neisseria</i>                                              | 0.01 (0.06)                                                 | 0.05 (0.18)                                               | 0.01 (0.03)                                                   | 0.05 (0.11)                       | 0.17†   |
| <i>Staphylococcus</i>                                         | 0.01 (0.04)                                                 | 0.01 (0.02)                                               | 0.03 (0.11)                                                   | 0.03 (0.09)                       | 0.69†   |
| <i>Veillonella</i>                                            | 0.00 (0.01)                                                 | 0.00 (0.01)                                               | 0.02 (0.04)                                                   | 0.04 (0.06)                       | 0.003†  |
| <i>Dolosigranulum</i>                                         | 0.00 (0.01)                                                 | 0.01 (0.02)                                               | 0.04 (0.13)                                                   | 0.01 (0.04)                       | 0.051†  |
| <i>Alloprevotella</i>                                         | 0.01 (0.03)                                                 | 0.00 (0.01)                                               | 0.01 (0.02)                                                   | 0.04 (0.08)                       | 0.009†  |
| <i>Corynebacterium</i>                                        | 0.00 (0.01)                                                 | 0.00 (0.01)                                               | 0.03 (0.08)                                                   | 0.01 (0.05)                       | 0.04†   |

Abbreviations: IQR, interquartile range; SD, standard deviation

\* Subclustering of the mixed profile was summarized in Table E8.

† Benjamini-Hochberg adjusted P-value accounting for multiple comparisons



**Table E8. Richness, Alpha-diversity, and Relative Abundance by Subcluster in Mixed Microbiota Profile in MARC-30 Substudy**

| Indices                                                       | Subcluster 1<br>n=42 | Subcluster 2<br>n=40 | Subcluster 3<br>n=16 | P-value |
|---------------------------------------------------------------|----------------------|----------------------|----------------------|---------|
| <b>Richness</b>                                               |                      |                      |                      |         |
| Number of genera, median (IQR)                                | 25 (19-31)           | 17 (12-23)           | 18 (16-25)           | 0.002   |
| <b>Alpha-diversity, median (IQR)</b>                          |                      |                      |                      |         |
| Shannon index                                                 | 1.98 (1.70-2.29)     | 1.41 (1.05-1.78)     | 1.63 (1.39-1.81)     | <0.001  |
| <b>Relative abundance of 10 most common genera, mean (SD)</b> |                      |                      |                      |         |
| <i>Streptococcus</i>                                          | 0.23 (0.12)          | 0.31 (0.14)          | 0.29 (0.10)          | 0.49*   |
| <i>Haemophilus</i>                                            | 0.10 (0.10)          | 0.03 (0.04)          | 0.34 (0.17)          | 0.003*  |
| <i>Moraxella</i>                                              | 0.01 (0.03)          | 0.42 (0.16)          | 0.03 (0.08)          | 0.003*  |
| <i>Prevotella</i>                                             | 0.18 (0.15)          | 0.02 (0.04)          | 0.02 (0.04)          | 0.003*  |
| <i>Neisseria</i>                                              | 0.09 (0.16)          | 0.01 (0.03)          | 0.02 (0.05)          | 0.20*   |
| <i>Staphylococcus</i>                                         | 0.01 (0.02)          | 0.04 (0.10)          | 0.06 (0.14)          | 0.63*   |
| <i>Veillonella</i>                                            | 0.07 (0.07)          | 0.02 (0.03)          | 0.03 (0.04)          | 0.003*  |
| <i>Dolosigranulum</i>                                         | 0.01 (0.03)          | 0.02 (0.05)          | 0.00 (0.00)          | 0.99*   |
| <i>Alloprevotella</i>                                         | 0.07 (0.12)          | 0.01 (0.02)          | 0.02 (0.04)          | 0.08*   |
| <i>Corynebacterium</i>                                        | 0.02 (0.06)          | 0.01 (0.03)          | 0.00 (0.00)          | 0.99*   |

Abbreviations: IQR, interquartile range; SD, standard deviation

The number of subclusters for the data was determined using the average silhouette score.

\* Benjamini-Hochberg adjusted P-value accounting for multiple comparisons.

**Table E9. Unadjusted and Multivariable Associations of Nasopharyngeal Microbiota Profiles with Bronchiolitis Outcomes, MARC-30 Substudy**

| Outcome by microbiota profile          | <u>Unadjusted model</u> |         | <u>Adjusted model*</u> |         |
|----------------------------------------|-------------------------|---------|------------------------|---------|
|                                        | OR (95% CI)             | P-value | OR (95% CI)            | P-value |
| <b>Intensive care use†</b>             |                         |         |                        |         |
| <i>Haemophilus</i> -dominant profile   | 6.98 (3.13-16.5)        | <0.001  | 5.34 (1.96-14.5)       | 0.001   |
| <i>Moraxella</i> -dominant profile     | Reference               |         | Reference              |         |
| <i>Streptococcus</i> -dominant profile | 3.64 (1.73-8.06)        | 0.001   | 1.95 (0.79-4.83)       | 0.15    |
| Mixed profile                          | 3.20 (1.54-7.05)        | 0.003   | 2.40 (0.96-5.95)       | 0.06    |
| <b>Hospital length-of-stay ≥3 days</b> |                         |         |                        |         |
| <i>Haemophilus</i> -dominant profile   | 7.81 (3.45-18.9)        | <0.001  | 6.70 (2.37-19.0)       | <0.001  |
| <i>Moraxella</i> -dominant profile     | Reference               |         | Reference              |         |
| <i>Streptococcus</i> -dominant profile | 3.72 (1.75-8.44)        | <0.001  | 1.89 (0.74-4.83)       | 0.18    |
| Mixed profile                          | 3.43 (1.63-7.74)        | 0.002   | 2.70 (1.05-6.93)       | 0.04    |

Abbreviations: CI, confidence interval; OR, odds ratio

\* Mixed-effects logistic regression model adjusting for 11 patient-level variables (age, sex, race/ethnicity, gestational age, history of breathing problems, daycare attendance, siblings at home, lifetime history of antibiotic use, history of corticosteroid use, use of antibiotics during the pre-hospitalization visit, and respiratory viruses detected by PCR) and sites as random effect

† Defined as admission to intensive care unit and/or use of mechanical ventilation (continuous positive airway pressure and/or intubation during inpatient stay, regardless of location) at any time during the index hospitalization
